1 **COVID-19 in Cambodia: Epidemiology, Response, and Lessons Learned, 27 January**

2 **2020–30 June 2022**

3  
4  
5 **Authors:** Srean Chhim<sup>1</sup>, Grace Marie Ku<sup>2</sup>, Sovathiro Mao<sup>1</sup>, Willem van de Put<sup>2</sup>, Wim Van  
6 Damme<sup>2,3</sup>, Por Ir<sup>1</sup>, Chhea Chhorvann<sup>1</sup>, Vandine Or<sup>4</sup>

7  
8 **Affiliations:**

9 <sup>1</sup> National Institute of Public Health, Phnom Penh, Cambodia

10 <sup>2</sup> Institute of Tropical Medicine, Antwerp, Belgium

11 <sup>3</sup> Vrije Universiteit Brussel, Belgium

12 <sup>4</sup> Ministry of Health, Phnom Penh, Cambodia

13  
14  
15 \* **Corresponding author:** Srean Chhim (Lot # 80, Samdach Penn Nouth Blvd. (St. 289), Phnom  
16 Penh, postal 120804), srean168@gmail.com

17  
18 **Keywords:** COVID-19, SARS-CoV-2, Cambodia

19  
20 **Word count 4063/5000**

21  
22

## 23 **ABSTRACT**

24 *Objective:* This review describes the COVID-19 epidemiology and response between 27 January  
25 2020 and 30 June 2022, and analyses the lessons learned for future public health responses in  
26 Cambodia.

27 *Methods:* We analysed the national COVID-19 database and reviewed literature.

28 *Results:* We classified Cambodia’s COVID-19 epidemiology into three phases. Phase 1 (27  
29 January 2020–19 February 2021) was when COVID-19 was well contained with only 578 cases,  
30 mainly imported (n = 320, 55.4%), and no deaths. Phase 2 (20 February 2021–31 October 2021)  
31 was when a large community outbreak occurred, with 255,792 cases and 2,805 deaths recorded.  
32 Phase 3 (1 November 2021–30 June 2022) was after the country’s full re-opening, with 47,314  
33 cases and 251 deaths. In phase 1, Cambodia responded using six non-pharmaceutical measures  
34 using the “5 Es” principle—*Early detection, Early isolation, Early tracing, Early treatment, and*  
35 *Early education*. Boosting the vaccination awareness campaign and coverage, and imposing a  
36 lockdown were the essential measures added to the above in phase 2. In phase 3, all non-  
37 pharmaceutical measures were lifted after high vaccination coverage of 93.1% of the population.  
38 *Conclusion:* Cambodia successfully contained the spread of SARS-CoV-2 in the first year and  
39 quickly attained high vaccine coverage by the second year of the response. The core of this  
40 success was the strong political will and high cooperation from the public. However, Cambodia  
41 needs to improve its medical infrastructure, human resources, and laboratory capacity for future  
42 health emergencies.

43

44 **Keywords:** COVID-19, SARS-CoV-2, Response, Cambodia, Lessons learned

45

## 46 **SUMMARY BOX**

### 47 WHAT IS ALREADY KNOWN ON THIS TOPIC

- 48       ▪ COVID-19 spread globally, but how the pandemic played out in each country depended
- 49           on various factors, including respective government responses and the general public's
- 50           adherence to COVID-19 measures.

### 51 WHAT DOES THIS STUDY ADD

- 52       ▪ Early response—*Early detection, Early isolation, Early tracing, Early treatment, and*
- 53           *Early education*—is the core of successful SARS-CoV-2 containment.
- 54       ▪ Achieving high vaccination coverage quickly leads to a decline in the number of deaths
- 55           and to eventual full re-opening of the country.
- 56       ▪ Responding to the pandemic requires decisive leadership, that refers to decisions being
- 57           made quickly, in a timely manner, and without delay.

### 58 HOW THIS STUDY MIGHT AFFECT RESEARCH, PRACTICE OR POLICY

- 59       ▪ This study highlights lessons learned and success stories in Cambodia for organising and
- 60           investing in responses for any future outbreaks.

61

62

## 63 INTRODUCTION

64 Starting in early 2020, COVID-19 spread globally. However, how the epidemic played out in  
65 each country depended on various factors, including respective government responses and the  
66 general public's adherence to COVID-19 measures.[1]

67 The early COVID-19 response in Cambodia was not, as yet, been well-documented in  
68 scientific publications. While several articles described the early phases of the COVID-19  
69 situation and the results of the COVID-19 responses, including non-pharmaceutical interventions  
70 (NPIs) to contain the spread of SARS-CoV-2, many important aspects, such as laboratory  
71 utilisation and vaccination, were overlooked.[2, 3]

72 Our review aims to describe the COVID-19 epidemiology and responses and their effects  
73 in preventing and reducing transmission. The review covers the period between 27 January 2020  
74 (when the first case, a 60-year-old Chinese man traveling with his family from Wuhan, China, to  
75 Cambodia for a tour, was detected) and 30 June 2022, several months after Cambodia's full re-  
76 opening. It also expands the lessons learned from implementing these responses through a  
77 policymakers' perspective. This can plausibly help to better prepare for future health shocks.

### 78 ***Setting and context***

79 Located in Southeast Asia, Cambodia borders Thailand, Vietnam, and Laos. Cambodia is a low-  
80 income country of 15.55 million people (as of 2019).[4] The overall population density is 87  
81 inhabitants per square kilometre (km<sup>2</sup>), with averages of 874 inhabitants per km<sup>2</sup> in urban and 55  
82 inhabitants per km<sup>2</sup> in rural settings. Approximately 60% of the population lives in rural areas.[4]  
83 Phnom Penh is the capital city, with a population of 2.3 million in 2019 or 3,361 inhabitants per

84 km<sup>2</sup>.<sup>[4]</sup> Cambodia's population is relatively young, with people aged 50 years or older  
85 accounting for only 18.4%.<sup>[4]</sup>

86 The Cambodian health system was already weak even before the pandemic. In 2014, the  
87 World Health Organization (WHO) estimated that Cambodia had 0.2 physicians per 1,000  
88 population.<sup>[5, 6]</sup> The ratio of hospital beds was also low at 0.9 per 1,000 population.<sup>[6, 7]</sup> There  
89 was no infrastructure for isolation of patients with highly infectious diseases.

90 Prior to the pandemic, it was found that Cambodia was not ready to respond to infectious  
91 disease outbreaks. In 2016, the Joint External Evaluation of the International Health Regulation  
92 (IHR) assessed Cambodia's capacity to prevent, detect, and rapidly respond to public health  
93 threats. The total score was 12.5% out of 100, indicating limited capacity.<sup>[8]</sup>

94 Throughout the pandemic, the COVID-19 responses in Cambodia have been constantly  
95 evolving, following the dynamics of the disease and availability of resources and tools (e.g.,  
96 vaccine). In Cambodia, the responses can be classified into three phases: containment phase,  
97 mitigation phase, and post country full re-opening phase.

## 98 **METHODOLOGY**

99 We analysed secondary data and reviewed relevant literature and documents to describe the  
100 epidemiology, responses, and strategies between 27 January 2020 and 30 June 2022 in  
101 Cambodia.

### 102 ***Data for descriptive epidemiology***

#### 103 **Tests, cases, and deaths**

104 The Inter-ministerial COVID-19 Response Committee provided the COVID-19 data for tests,  
105 cases, and deaths recorded between 27 January 2020 and 30 June 2022. The COVID-19 data is

106 under the governance and stewardship of the Inter-ministerial COVID-19 Response Committee,  
107 with Cambodia's Communicable Disease Control Department (CCDC) being the central body  
108 responsible for collection and storage. The data were stored at the individual level, allowing  
109 them to be stratified by age group, gender, and geographical areas at the provincial and district  
110 levels. These individual data were collected from all laboratories in Cambodia, using a  
111 laboratory form (see supplementary file 1). The completed forms were entered into each  
112 laboratory database and exported to a CSV or Excel file and submitted to the CCDC. At the  
113 CCDC, these files were checked for standardisation, and imported into the National COVID-19  
114 Database.

## 115 ***Data for response and themes***

### 116 **Relevant events**

117 We documented relevant events to draw a more comprehensive picture of the COVID-19  
118 response in Cambodia. Our data team recorded all the policies and guidelines issued by the  
119 government, and triangulated these documents with other documents (e.g., WHO website  
120 updates, situation reports). The information we collected included dates of border closures,  
121 school closures, cancellation/prohibition of public events and gatherings, enforcement of  
122 facemask usage in public areas, and lockdowns.

123

### 124 **Vaccination data**

125 The National COVID-19 Vaccination Committee provided vaccination data. These data included  
126 the number of vaccine doses that the government obtained through purchasing and donations,  
127 and can be stratified by vaccine brand and donor country. It also included vaccination coverage  
128 data: the number of vaccinated individuals, and the number of doses administered (e.g., one

129 dose/incomplete immunisation, two doses/completed immunisation, three doses, four doses, and  
130 five doses).

## 131 **RESULTS**

### 132 ***COVID-19 epidemiology***

133 Figure 1 presents the daily number of COVID-19 cases, tests done, and deaths in Cambodia  
134 between the first documented case (27 January 2020) and 30 June 2022. We identified three  
135 significant timepoints of the pandemic in Cambodia.

136

#### 137 **Phase 1 (27 January to 19 February 2021): containment phase**

138 Phase 1 lasted for 389 days. COVID-19 was well-contained in this phase. Cambodia had only  
139 578 cases, mainly imported ( $n = 320$ , 55.4%), and no deaths (Figure 1 and Table 1).

140

#### 141 **Phase 2 (20 February to 31 October 2021): mitigation phase**

142 Phase 2 was known as the large community outbreak phase and lasted for 252 days with 255,792  
143 cases (Figure 1 and Table 1). Of these, only a small proportion were imported cases ( $n = 19,480$ ,  
144 8.2%). A total of 2,805 COVID-19 deaths were reported, giving a case-fatality rate of 1.1%  
145 (Figure 2 and Table 1). Deaths occurred disproportionately in the population aged 50 years and  
146 over, with case-fatality of 4.9% (Figure 3). The most affected period was between March and  
147 October 2021 (Figure 3).

148

#### 149 **Phase 3 (1 November 2021 to 30 June 2022): full re-opening**

150 Phase 3 had 47,314 cases, in which 3,595 cases (7.6%) were imported (Figure 1 and Table 1). In  
151 this phase, 251 deaths were reported, resulting in a case-fatality rate of 0.5%.

152

153 **Figure 1. COVID-19 daily cases, tests, and deaths in Cambodia, 2020–2022 [Insert**

154 **Figure 1]**

155

156 Table 1. Reported COVID-19 cases and deaths by phase in Cambodia, 27 January 2020 to 30  
157 June 2022

| Phase of COVID-19 outbreak                           | Theme                                           | All cases | Imported cases (%) | Death (%)   |
|------------------------------------------------------|-------------------------------------------------|-----------|--------------------|-------------|
| <b>Phase 1. 27 January 2020 to 19 February 2021:</b> | Containment with NPIs                           | 578       | 320 (55.4)         | 0 (0.0)     |
| <i>27 January–30 April 2020</i>                      | Initial response                                | 144       | 88 (61.1)          | 0 (0.0)     |
| <i>1 May–31 October 2020</i>                         | Relaxing after long period of low cases         | 167       | 85 (50.9)          | 0 (0.0)     |
| <i>1 November 2020–19 February 2021</i>              | Intensifying response for larger scale outbreak | 267       | 147 (55.1)         | 0 (0.0)     |
| <b>Phase 2. 20 February 2021 to 31 October 2021</b>  | Large community outbreak and vaccination        | 255,792   | 19,480 (7.6)       | 2,805 (1.1) |
| <b>Phase 3. 1 November 2021 to 30 June 2022</b>      | Full re-opening                                 | 47,314    | 3,595 (7.6)        | 251 (0.5)   |

158 Abbreviations: NPIs, Non-pharmaceutical interventions

159

160 **Figure 2. The death trends in Cambodia, 2021–2022 [Insert Figure 2]**

161 **Figure 3. The COVID-19 death rate in percent by age groups in Cambodia, 2021–**

162 **2022 [Insert Figure 3]**

163

164

165



166 **Response**

167 The government implemented eight significant measures during phases 1 and 2: (1) *detect*,  
 168 *isolate/quarantine*; (2) *face coverings, hand hygiene, and physical distancing measures*; (3) *risk*  
 169 *communication and community engagement*; (4) *school closures*; (5) *border closures*; and (6)  
 170 *public event and gathering cancellation*; (7) *vaccination*; and (8) *lockdown* (Table 2). Each of  
 171 these measures was implemented when the need for such intervention was seen to be warranted.  
 172 We note that the first six measures were implemented during phase 1, and measures 7 and 8 were  
 173 added in phase 2.

174 Table 2: Description of the eight measures used in Cambodia in response to the COVID-19  
 175 outbreak

| No | Measure                                               | Description                                                                                                                                                                                                                                                                                                                                                                                                                                                                                                                   | Timeframe                                                                     |
|----|-------------------------------------------------------|-------------------------------------------------------------------------------------------------------------------------------------------------------------------------------------------------------------------------------------------------------------------------------------------------------------------------------------------------------------------------------------------------------------------------------------------------------------------------------------------------------------------------------|-------------------------------------------------------------------------------|
| 1  | Detect, isolate/quarantine                            | This measure was used to detect cases for isolation and find contacts for quarantine.<br><br>Contact tracing was the primary measure to trace the contacts, test them, and quarantine them. Contact tracing commenced within 24 hours after a confirmed case was detected. The contacts were classified into high, medium, and low risk. High and medium-risk contacts were tested at least two times during the quarantine. Low-risk contacts were tested if they had any signs or symptoms during the quarantine period.[9] | <ul style="list-style-type: none"> <li>Phase 1 and early phase 2</li> </ul>   |
| 2  | Face coverings, hand hygiene, and physical distancing | This measure was known as “3 DOs and 3 DON’Ts.” The “3 DOs” refer to (1) wearing a face mask properly, (2) washing hands frequently with alcohol, gel, or soap, and (3) maintaining a physical distance of at least 1.5 meters from others.<br><br>The “3 DON’Ts” refers to (1) not going to places that are not well-ventilated, (2) not going to crowded places, and (3) not touching others, shaking hands, or hugging.                                                                                                    | <ul style="list-style-type: none"> <li>All phases, to 30 June 2022</li> </ul> |
| 3  | Risk communication and community engagement           | It refers to the regular sharing of official information through various MoH’s communication channels to timely raise awareness and dispel circulating myths and rumours, especially on social media.                                                                                                                                                                                                                                                                                                                         | <ul style="list-style-type: none"> <li>All phases, to 30 June 2022</li> </ul> |
| 4  | School closure                                        | School closure refers to the halt of in-person                                                                                                                                                                                                                                                                                                                                                                                                                                                                                | <ul style="list-style-type: none"> <li>Phase 1</li> </ul>                     |

|   |                                         |                                                                                                                                                                                                                                                                                                                                                                                                                                                                                                                                                                                           |                                                                                                                                                                                 |
|---|-----------------------------------------|-------------------------------------------------------------------------------------------------------------------------------------------------------------------------------------------------------------------------------------------------------------------------------------------------------------------------------------------------------------------------------------------------------------------------------------------------------------------------------------------------------------------------------------------------------------------------------------------|---------------------------------------------------------------------------------------------------------------------------------------------------------------------------------|
|   |                                         | <p>teaching in schools.</p> <p>The nationwide school closure commenced on 16 March when Cambodia had detected 24 cases. On 6 September 2020, the government re-opened the schools countrywide after a low possibility of a community outbreak. On 1 December 2020, the government closed all schools countrywide again after a large cluster was detected. School closures were continued until the country’s full re-opening on 1 November 2021.</p>                                                                                                                                     | <ul style="list-style-type: none"> <li>○ Closure 1: 16 March to 6 September 2020</li> <li>○ Closure 2: 1 December 2020 to 1 November 2021</li> </ul>                            |
| 5 | Border restriction/closure              | <p>On 16 March 2020, Cambodia closed all border gates with Vietnam. On 16 April 2020, it implemented travel restrictions for passengers from France, Germany, Iran, Italy, Spain, and the United States of America. On 20 May 2020, the government required all passengers to have a COVID-19 negative certificate within 72 hours before flying (effective until 31 October 2021); it also required health insurance with a minimum amount of USD 50,000, and another test on arrival and quarantine for 14 days at a government-designated place (effective until 1 November 2021).</p> | <ul style="list-style-type: none"> <li>▪ Phase 1 <ul style="list-style-type: none"> <li>○ Closure 1: 16 March to 19 May 2020, unless otherwise indicated</li> </ul> </li> </ul> |
| 6 | Public event and gathering cancellation | <p>This measure was used to cancel all public events (e.g., Khmer New Year) and gatherings (e.g., wedding celebrations, usual funerals, memorial services, and all festivals).</p>                                                                                                                                                                                                                                                                                                                                                                                                        | <ul style="list-style-type: none"> <li>▪ All phases, to 30 June 2022</li> </ul>                                                                                                 |
| 7 | Vaccination                             | <p>The goal of COVID-19 vaccination is to reduce transmission, severe cases, hospitalisations and deaths from COVID-19. On 10 February 2021, 10 days before Cambodia declared the large community outbreak, Cambodia started vaccine rollout with the Sinopharm vaccine. The vaccination campaign accelerated in April 2021 as cases increased exponentially. By mid-September 2021, 93.1% of the 15.55 million population had received at least two doses/completed immunisation.</p>                                                                                                    | <ul style="list-style-type: none"> <li>▪ Late Phase 1, Phase 2, and Phase 3</li> </ul>                                                                                          |
| 8 | Lockdown                                | <p>Lockdown is a large-scale local travel restriction. Cambodia started a countrywide lockdown between 15 April and 15 May 2021. By “lockdown”, we refer to restrictions on movement <i>between</i> villages or communes. Individuals could travel <i>within</i> the village or communes; however, they were advised to stay at home.</p>                                                                                                                                                                                                                                                 | <ul style="list-style-type: none"> <li>▪ Phase 2 <ul style="list-style-type: none"> <li>○ Lockdown: 15 April to 15 May 2021</li> </ul> </li> </ul>                              |

176

177 We describe the responses in each phase as follows:

178 **Phase 1. 27 January 2020 to 19 February 2021: containment with NPIs**

179 After detecting its first case on 30 January 2020 Cambodia started implementing mandatory  
180 temperature screenings for all travellers entering Cambodia at all points of entry (airports and  
181 international borders). In March and April 2020, Cambodia detected several clusters of imported  
182 cases that were not identified through the temperature screening system. These cases were  
183 detected through notifications from the WHO’s IHR channel and event-based surveillance  
184 (screening local and international news).

185 To respond to these clusters, intensive contact tracing was undertaken to trace, test and  
186 quarantine the contacts. This strategy was an essential component of “*Measure 1: detect,*  
187 *isolate/quarantine*”. Contact tracing commenced within 24 hours after a confirmed case was  
188 detected. All contacts were quarantined at quarantine centres or homes for 14 days from the last  
189 date of exposure. In 2020, Cambodia missed several opportunities to detect imported COVID-19  
190 cases at the international border gates. From these primary cases, the virus spread locally.  
191 Contact tracing was used to find cases for isolation, and contacts for quarantine, thereby  
192 containing the spread.

193 Alongside measure 1, Cambodia also implemented *Measure 2: face covering, hand*  
194 *hygiene, and physical distancing* since it detected its first case. The government strongly advised  
195 people to take measures for self-protection such as wearing face masks, hand-washing, and  
196 physical distancing, which were complied to by the population.

197 The government, through the Ministry of Health (MoH) also implemented *Measure 3: risk*  
198 *communication and community engagement* since it detected its first case. Regular sharing of  
199 official information through various MoH communication channels helped to dispel circulating  
200 myths, false information and rumours, especially on social media.[10] The MoH reiterated

201 simple messages to the public, known as “3 DOs and 3 DON’Ts.” The “3 DOs” refer to (1)  
202 wearing a face mask properly, (2) frequent hand disinfection using alcohol, gel-based  
203 formulations, or soap, and (3) maintaining a physical distance of at least 1.5 meters from others.  
204 The “3 DON’Ts” refer to (1) not going to places that are not well-ventilated, (2) not going to  
205 crowded places, and (3) not touching others, shaking hands, or hugging. These nationwide  
206 communication campaigns stimulated cooperation from the public. They were launched by the  
207 MoH through the “Sub-Committee on Education, Training, and Public Communication of the  
208 Inter-ministerial Committee to Fight COVID-19” with the theme “*Acting together to stop*  
209 *COVID-19 transmission*”.

210 On 16 March 2020, when the country’s total number of detected cases reached 24,  
211 *Measure 4: school closures* were effected nationwide. In as much as 23 of the cases (95.8%)  
212 were imported, Cambodia also implemented *Measure 5: border closures*. Cambodia closed all  
213 border gates with Vietnam before full closures with other countries. On 26 March 2020, when  
214 Cambodia reached 90 cases, *Measure 6: cancellation of all public events* (e.g., Khmer New  
215 Year) and *gatherings* (e.g., wedding celebrations, usual funeral memorial services, all festivals)  
216 were imposed. Travel restrictions for passengers from France, Germany, Iran, Italy, Spain, and  
217 the United States of America were implemented on 16 April 2020.

218 By 20 May 2020, following the increasing trends of cases, travel restrictions were  
219 modified and the government required all passengers to have a COVID-19 negative certificate  
220 within 72 hours before flying, health insurance with a minimum amount of USD 50,000, another  
221 test on arrival, and quarantine for 14 days at a government-designated place.

222 After a few months with low cases, the government considered Cambodia had a low-risk  
223 of transmission outbreak and decided to re-open all schools nationwide on 6 September 2020.

224 On 3 November 2020, the Hungarian Foreign Minister had a two-day visit to Cambodia  
225 and met several hundred government officials including the Prime Minister, students, and  
226 teachers, on different occasions. On 6 November 2020, he tested positive for SARS-CoV-2 when  
227 he arrived in Bangkok, Thailand. It was locally known as the “3 November Event”. Everyone  
228 who attended the gatherings and their contacts (over 2,000 people) were tested and quarantined  
229 at home for 14 days since the last date of exposure. Four cases were detected as part of this  
230 cluster. It was unclear who the source of infection was, as the Hungarian Foreign Minister tested  
231 negative within 72 hours before flying to Cambodia. The “3 November Event” prompted the  
232 government to tighten all measures due to its high potential for community transmission. On 23  
233 November 2020, the government announced the closure of the “3 November Event” after no  
234 more cases were detected.

235 On 28 November 2020, Cambodia announced its first community transmission after a  
236 woman was hospitalised with respiratory symptoms and later tested positive for SARS-CoV-2,  
237 locally known as the “28 November community outbreak”. Six of her family members also  
238 tested positive for SARS-CoV-2. Her family members who tested positive had no history of  
239 travel abroad. However, she and her family had trips to several provinces in Cambodia and  
240 shopping centres for “Black Friday”. As a response, massive testing and quarantine were  
241 implemented, and where those affected were noted to have cooperated. All individuals who were  
242 at sites where one or more of the confirmed cases had visited were tested. Certain commercial  
243 businesses (e.g., AEON supermarket) were closed for 14 days. On 1 December 2020, the  
244 government re-instated nationwide school closures for in-person classes and ordered online  
245 classes to be administered instead. It remained in effect until the country’s full re-opening.  
246 Within the span of one month, over 20,000 people were tested and home-quarantined as part of

247 this cluster. Forty-one cases (no deaths) were detected from this event. On 29 December 2020,  
248 the government announced the closure of the “28 November community outbreak”.

249

250 **Phase 2. 20 February 2021 to 31 October 2021: mitigation with boosting vaccination**  
251 **coverage**

252 Ten days before this phase, on 10 February 2020, Cambodia started *Measure 7: rolling out*  
253 *COVID-19 vaccination* with the Sinopharm vaccine after China donated one million doses of the  
254 said vaccine.

255 On 19 February 2021, two foreign women were known to have escaped the quarantine  
256 hotels to visit a night club while waiting for testing results before they could leave the quarantine  
257 site. Their results were positive for SARS-CoV-2. It triggered the government to start a large-  
258 scale testing of the night club’s visitors. Over 20 cases were identified. On the same date, the  
259 laboratory of the National Institute of Public Health also detected a few cases among those who  
260 had requested testing to secure a travel certificate.

261 On 20 February 2021, Cambodia announced a second community outbreak event, locally  
262 known as the “20 February community outbreak”.

263 To respond to this new event, two new measures—*Measure 7: vaccination and Measure*  
264 *8: lockdown*—were added to the six measures implemented in Phase 1.

265 *Measure 1: trace, isolate/quarantine* was intensified. All individuals in the buildings or  
266 sites where one or more confirmed cases had visited were tested. Around 8,000 tests were  
267 performed per day which was the full capacity of Cambodia’s laboratories at that time. However,  
268 the cases increased exponentially (Figure 1). The other five measures were also intensified.

269 *Measure 8: lockdown* was implemented covering the period between 15 April and 15  
270 May 2021. Despite these more stringent measures, cases continued to rise (Figure 1).

271 During the same period, from April 2021, the vaccination campaign was *sped up* and ran  
272 without interruption. On average, 50,000 doses were provided daily and quickly achieved  
273 vaccination coverage in more than 93.1% of the total population within five months (n =  
274 14,485,634 out of 15,552,211) by 15 September 2021.

275 After achieving high vaccination coverage, the government stopped active surveillance, but  
276 monitored two indicators—severe cases and deaths—to ensure that the COVID-19 situation  
277 remains under control.

### 278 **Phase 3. 1 November 2021 to 30 June 2022: full re-opening**

279 Without any unusual increase in severe cases and deaths for 30 days in a row, the government  
280 decided to lift all compulsory containment measures from 1 November 2021.[11] Soon after, all  
281 non-pharmaceutical measures were lifted. However, a significant proportion of people in urban  
282 cities still choose to wear masks until the end of analysis period.

283

## 284 **Strategy**

285 We retrospectively identified six themes from the COVID-19 responses in Cambodia.

### 286 **Theme 1: Setting up and managing a new response system**

287 Cambodia has learned quickly and adapted to the dynamics of the disease. When the number of  
288 COVID-19 cases started to increase from March 2020, the Prime Minister led the national  
289 response. He created and chaired the National COVID-19 Response Committee. This committee  
290 was composed of high-level committees to give advice on the various aspects of the country's  
291 COVID-19 response. The high-level committees included 25 Provincial COVID-19 Committees,

292 each chaired by the provincial governors to monitor the responses in each province, the High-  
293 level Ministry of Health Task Force to mobilise resources and the Technical Working Group led  
294 by Cambodia’s CCDC with technical support from governmental and non-governmental  
295 stakeholders to provide technical advice on the COVID-19 emergency response.

296

### 297 **Theme 2: Containing the spread with early response**

298 As described previously, six measures were implemented to contain the spread of the virus.  
299 These measures had a background-strategy, the so-called “5 Es”—E1 for Early Detection, E2 for  
300 Early Isolation, E3 for Early Tracing, E4 for Early Treatment, and E5 for Early Education.

### 301 **Theme 3: Strengthening the identification of cases and contacts**

302 Cambodia trained new rapid response teams (RRTs), increasing from around 2,000 to over 5,000  
303 by the end of phase 1. The capacities of existing laboratories were increased and 18 new  
304 laboratories in Phnom Penh and 11 provinces were set up. Testing capacity increased from 500  
305 PCR tests per day in April 2020, to around 15,000 PCR tests per day in July 2021.

306

### 307 **Theme 4: Strengthening care for COVID-19 patients**

308 To reduce the case-fatality rate, Cambodia had to strengthen the capacity of its health care  
309 system.[12] Cambodia addressed this issue by increasing the number of doctors and nurses who  
310 had the capability to manage the disease.

311 During phase 1, Cambodia trained public healthcare providers from over 1,300 public  
312 healthcare facilities, including health centres, to treat and care for COVID-19 patients. In  
313 addition, it trained doctors- and nurses-in-training to treat and care for COVID-19 patients.



314 School buildings, wedding buildings, and abandoned hotels were temporarily repurposed  
315 as isolation and treatment centres.

316

### 317 **Theme 5: Boosting vaccination coverage**

318 While the cases seemed unstoppable, in April 2021, Cambodia tried to boost the vaccination rate  
319 to build herd immunity.

320 Cambodia supplied basic doses with the Sinovac, Sinopharm, Moderna, or Janssen  
321 vaccines. The AstraZeneca and Pfizer vaccines were provided as adult booster doses. Children  
322 received the Sinovac and/or Pfizer (paediatric) vaccines and no booster doses were given.

323 A total of 53.47 million doses of the COVID-19 vaccine were obtained (Table 3). Over  
324 half (53%) were purchased using the state budget and the remainder were provided through  
325 foreign aid. The majority of the vaccines was the Sinovac vaccine (64.4%), followed by the  
326 Sinopharm vaccine (14.6%), the Pfizer vaccine (9.6%), the AstraZeneca vaccine (9.1%), and the  
327 remainder were the Janssen and Moderna vaccines (2.4%).

328 Table 3. Vaccine doses obtained by the Cambodian government in 2021

| Resource        | Sinovac    | Sinopharm | AstraZeneca | Pfizer    | Janssen   | Pfizer (Paediatric) | Moderna | Total      | %     |
|-----------------|------------|-----------|-------------|-----------|-----------|---------------------|---------|------------|-------|
| National budget | 24,500,000 | 4,000,000 |             |           |           |                     |         | 28,500,000 | 53.3% |
| China's aid     | 9,500,000  | 3,800,000 |             |           |           |                     |         | 13,300,000 | 24.9% |
| COVAX           | 424,800    |           | 2,253,900   | 1,999,530 | 1,060,100 |                     | 188,160 | 5,926,490  | 11.1% |
| Australia's aid |            |           |             | 2,350,530 |           | 186,800             |         | 2,537,330  | 4.7%  |
| Italy's aid     |            |           | 1,056,000   |           |           |                     |         | 1,056,000  | 2.0%  |
| Hungary's aid   |            |           | 523,100     |           |           |                     |         | 523,100    | 1.0%  |
| Poland's aid    |            |           | 300,000     |           |           | 143,990             |         | 443,990    | 0.8%  |
| UK's aid        |            |           | 415,040     |           |           |                     |         | 415,040    | 0.8%  |
| India's aid     |            |           | 325,000     |           |           |                     |         | 325,000    | 0.6%  |
| Spain's aid     |            |           |             |           |           | 300,000             |         | 300,000    | 0.6%  |
| ASEAN           |            |           |             | 139,230   |           |                     |         | 139,230    | 0.3%  |
| Total           | 34,424,800 | 7,800,000 | 4,873,040   | 4,489,290 | 1,060,100 | 630,790             | 188,160 | 53,466,180 | 100%  |
| %               | 64.4%      | 14.6%     | 9.1%        | 8.4%      | 2.0%      | 1.2%                | 0.4%    | 100%       |       |

329

## 330 **Theme 6: Supporting the disadvantaged groups**

331 Lockdown negatively impacts those in disadvantaged groups, particularly, daily-wage earners  
332 (e.g., garment workers, Tuk-tuk (motorcycle), taxi drivers, construction workers, and street  
333 vendors).[13] The government and local and international development partners strived to  
334 respond in a timely manner to help the disadvantaged groups.[13] Initially, delivering food  
335 supplies in Cambodia had been too slow and challenging due to the absence of a food  
336 distribution infrastructure specifically for the poor.[3, 13, 23]. Nevertheless, between May 2020  
337 and May 2021, the government provided social assistance through the COVID-19 Cash Transfer  
338 Programme to 700,000 low-income households, equivalent to more than 2.8 million individuals.  
339 By June 2021, each household had received an average of USD 366 in nine instalments.[14]

340

## 341 **DISCUSSION**

342 This analysis describes how the COVID-19 epidemiology evolved in Cambodia and how the  
343 country responded between 27 January 2020 (when the first case was detected) and 30 June 2022  
344 (several months after the country announced full re-opening). It also highlights the strategies  
345 behind the responses.

346 The COVID-19 epidemiology in Cambodia is split into three phases. The first phase from  
347 27 January 2020 to 19 February 2021 when the COVID-19 outbreak was well contained without  
348 a single death. According to WHO data, by 7 February 2021, Cambodia had the 7<sup>th</sup> lowest  
349 number of cases per 100,000 population, among 214 countries and territories.[15] However, we  
350 acknowledge that it is difficult to compare number of cases with other countries because they are  
351 severely impacted by different surveillance efforts and testing capacities. The second phase from  
352 20 February to 31 October 2021 was the large community outbreak stage. During this phase,

353 Cambodia recorded 2,805 deaths out of 15,552,211 population, giving a mortality rate of 180 per  
354 million. This mortality rate ranked 74<sup>th</sup> out of 214 countries and territories reported to the  
355 WHO.[16] In the third phase, after the country fully re-opened on 1 November 2021, 47,314  
356 cases and 251 deaths were recorded, but the cases were also largely under-reported due to the  
357 relaxation of all interventions, including testing. Nevertheless, we note that the country still  
358 monitored severe cases and deaths from COVID-19, but we could not access the number of  
359 severe cases.

360 Cambodia responded with NPIs during the first phase, and added lockdown and vaccines  
361 in the second phase. The six measures in the first phase included (1) *detect, isolate/quarantine*;  
362 (2) *face coverings, hand hygiene, and physical distancing measures*; (3) *risk communication and*  
363 *community engagement*; (4) *school closures*; (5) *border closures*; and (6) *public event and*  
364 *gathering cancellation*. These measures worked well in the Cambodian context with high  
365 cooperation from the public. It also may have benefited from early action when the community  
366 transmission has not yet existed. In the second phase, the implementation of the lockdown had  
367 not achieved the expected results. The number of cases continued to increase. This may be due to  
368 authorities locking down the areas instead of houses, allowing people to move within the area. In  
369 this second phase, high coverage of the COVID-19 vaccine might have been the only measure  
370 that helped reduce infections and deaths and help Cambodia re-open the country.

371 Cambodia responded with several strategies: (1) *setting up and managing a new response*  
372 *system*, (2) *containing the spread with early response*, (3) *strengthening the identification of*  
373 *cases and contacts*, (4) *strengthening care for COVID-19 patients*, (5) *boosting vaccination*  
374 *coverage, and (6) supporting the disadvantaged groups*. The core of these strategies relied on

375 strong governance and decisive leadership (fast, at the right time, without delay) to respond early  
376 to prevent infections and deaths, and to support those who required livelihood support.

### 377 ***Lessons learned***

378 From Cambodia’s COVID-19 response, we can learn several lessons. First, the COVID-19  
379 response requires decisive leadership. Second, the response must be early and include contact  
380 tracing, risk communication, community engagement, and expansion of the laboratory capacity.  
381 Third, the lockdown did not produce the expected results. Fourth, rapid nationwide vaccination  
382 achieving a high coverage rate was crucial and provided Cambodia a ticket to re-open the  
383 country. Fifth, cooperation from public was a relevant and necessary factor.

384

#### 385 **1. COVID-19 response requires decisive leadership**

386 The COVID-19 pandemic is a “wicked problem” [17] and many decisions were made amidst  
387 uncertainties. Leadership is a core part of governance, referring to the government’s ability to  
388 provide guidance, plan, and make appropriate modifications to the laws or regulations at all  
389 levels and sectors to enable an effective response.

390 We learned that responding to the pandemic requires decisive leadership, referring to  
391 decisions being taken fast, timely, and without delay. With this characteristic, Cambodia  
392 responded promptly, despite low pre-pandemic capacity. Literature suggests that decisive  
393 leadership led to success in responding to COVID-19.[18-22] Similar leadership characteristics  
394 and outcome at the early phase were seen in China, New Zealand, Taiwan, and South Korea.[18-  
395 22]

396

397        **2. The response must be early and include contact tracing, risk communication, and**  
398                **strengthening laboratory capacity, which were the core element of the early**  
399                **response**

400 Cambodia could contain the spread of the virus for more than a year with early  
401 responses/actions. Contact tracing was not only to find the cases, isolate them, and find their  
402 contacts, but it also provided real-time information, which was necessary for the response teams  
403 to decide where to impose additional restrictions. Effective risk communication and community  
404 engagement was critical to educate people to receive reliable information and gain trust, and  
405 strengthened cooperation from the public. However, the laboratory capacity determines the speed  
406 of the response. The response could be slower or faster based on the number of tests that can be  
407 performed within a time period.

408

409        **3. Lockdown must accompany support to disadvantaged groups**

410 Lockdown is a controversial measure for many settings as it affects the livelihoods of many  
411 individuals. Supporting the needs of low-income families was essential to reducing the burden of  
412 COVID-19.

413

414        **4. Vaccination gave Cambodia a ticket to re-open the country**

415 As a low-income country, Cambodia was unique in achieving high vaccination coverage quickly.  
416 Upon achieving a 93.5% vaccination coverage in mid-September 2021, a marked decline in the  
417 number of deaths was noted by October and a massive decrease in the number of cases  
418 approximately one month later. Cambodia was then able to fully re-open the country.

419

## 420 **5. Cooperation from the public was the necessary factor**

421 From the measures described above, adherence and compliance from the general public is  
422 required.[2] The government called it solidarity. This compliance is a fundamental factor for  
423 success in containing the spread in the early phase, and the very successful vaccination campaign  
424 in the latter stage.

### 425 ***Strengths***

426 This review is among the few that presents the COVID-19 epidemiology and response, and  
427 highlights lessons learned in Cambodia for organising and investing in future responses.

### 428 ***Limitations***

429 Our review has a few limitations. First, the relationship between epidemiology and response may  
430 or may not be causal. Second, the COVID-19 data may be highly under-reported and may not  
431 reflect the actual trends due to limited testing capacity and changing surveillance strategies.  
432 However, we are confident that what may have been missed were cases not requiring  
433 hospitalization and/or medical attention, or the asymptomatic and mild COVID-19 infections.  
434

## 435 **CONCLUSION**

436 Despite low levels of preparedness for the pandemic, Cambodia successfully contained the  
437 spread of SARS-CoV-2 in the first year and quickly attained high vaccine coverage by the  
438 second year of the response. The core of this success was the strong political will and high  
439 cooperation from the public. However, Cambodia needs to improve its preparedness, especially

440 on medical infrastructure to isolate cases, control infectious disease outbreaks, and further

441 develop its human resources and laboratory capacity.

442

443 **ACKNOWLEDGMENTS**

444 We would like to thank all the Inter-ministerial COVID-19 Response Committee and  
445 Cambodia's Communicable Disease Control Department (CCDC) for providing data.

446 **AUTHOR CONTRIBUTIONS**

447 SC, GK, SM, WP, WD, PI, CC, and VO, designed the study; SC analyzed data; SC, GK, SM,  
448 WP, WD, PI, CC, and VO wrote the manuscript.

449 **FUNDING**

450 This work received no external funding.

451 **CONFLICT OF INTERESTS**

452 All authors have declared no competing interest.

453 **ETHICS APPROVAL**

454 Not applicable.

455 **DATA AVAILABILITY STATEMENT**

456 Data are available on reasonable request. Data are available on reasonable request to Dr. Vandine  
457 Or ([vandine@online.com.kh](mailto:vandine@online.com.kh)).

458

459



## 460 REFERENCES

- 461 1. Van Damme W, Dahake R, Delamou A, *et al.* The COVID-19 pandemic: diverse contexts;  
462 different epidemics—how and why? *BMJ Glob Health* 2020;5(7):e003098. doi:  
463 10.1136/bmjgh-2020-003098
- 464 2. Nit B, Samy AL, Tan SL, *et al.* Understanding the Slow COVID-19 Trajectory of Cambodia.  
465 *Public Health Pract (Oxf)* 2021;2:100073. doi: 10.1016/j.puhip.2020.100073 [published  
466 Online First: 2021/02/02]
- 467 3. Tatum M. Cambodia ends controversial COVID-19 restrictions. *Lancet*  
468 2021;397(10289):2035. doi: 10.1016/S0140-6736(21)01196-X
- 469 4. National Institute of Statistic (NIS). General Population Census of the Kingdom of Cambodia  
470 2019, Phnom Penh, Cambodia: NIS, 2019. Available:  
471 [https://nis.gov.kh/nis/Census2019/Final%20General%20Population%20Census%202019-](https://nis.gov.kh/nis/Census2019/Final%20General%20Population%20Census%202019-English.pdf)  
472 [English.pdf](https://nis.gov.kh/nis/Census2019/Final%20General%20Population%20Census%202019-English.pdf) [Accessed 16 December 2022].
- 473 5. The World Bank. Physicians (per 1,000 per people) - Cambodia, Washington DC: The World  
474 Bank, 2014. Available:  
475 <https://data.worldbank.org/indicator/SH.MED.PHYS.ZS?locations=KH> [Accessed 16  
476 December 2022].
- 477 6. World Health Organization. The Global Health Observatory, Geneva, Switzerland: WHO,  
478 2020. Available: [https://www.who.int/data/gho/data/indicators/indicator-](https://www.who.int/data/gho/data/indicators/indicator-details/GHO/hospital-beds-(per-10-000-population))  
479 [details/GHO/hospital-beds-\(per-10-000-population\)](https://www.who.int/data/gho/data/indicators/indicator-details/GHO/hospital-beds-(per-10-000-population)) [Accessed 16 December 2022].
- 480 7. The World Bank. Beds (per 1,000 per people) - Cambodia, Washington DC: The World Bank,  
481 2016. Available: <https://data.worldbank.org/indicator/SH.MED.BEDS.ZS?locations=KH>  
482 [Accessed 16 December 2022].
- 483 8. World Health Organization. Joint External Evaluation of IHR Core Capacities, Geneva,  
484 Switzerland: WHO, 2017. Available: <https://apps.who.int/iris/handle/10665/254705>  
485 [Accessed 16 December 2022].
- 486 9. Chhim S. Applied Epidemiology in Cambodia. The Australian National University  
487 (Australia), 2021.
- 488 10. World Health Organization. 2019 Novel Coronavirus (2019-nCoV): Strategic Preparedness  
489 and Response Plan, Geneva, Switzerland: WHO, 2020. Available:  
490 [https://www.who.int/publications/i/item/strategic-preparedness-and-response-plan-for-](https://www.who.int/publications/i/item/strategic-preparedness-and-response-plan-for-the-new-coronavirus)  
491 [the-new-coronavirus](https://www.who.int/publications/i/item/strategic-preparedness-and-response-plan-for-the-new-coronavirus) [Accessed 16 December 2022].
- 492 11. Kunthear M. PM declares Cambodia fully reopen from Nov 1, Phnom Penh: The Phnom  
493 Penh Post, 2021. Available: [https://www.phnompenhpost.com/national/pm-declares-](https://www.phnompenhpost.com/national/pm-declares-cambodia-fully-reopen-nov-1)  
494 [cambodia-fully-reopen-nov-1](https://www.phnompenhpost.com/national/pm-declares-cambodia-fully-reopen-nov-1) [Accessed 16 December 2022].
- 495 12. Sheikhbardsiri H, Raeisi AR, Nekoei-Moghadam M, *et al.* Surge Capacity of Hospitals in  
496 Emergencies and Disasters With a Preparedness Approach: A Systematic Review.  
497 *Disaster Med Public Health Prep* 2017;11(5):612-20. doi: 10.1017/dmp.2016.178  
498 [published Online First: 2017/03/08]
- 499 13. Macdonald S. Learning from Cambodia's COVID-19 Response: Foreign Policy in Focus  
500 (FPIF), 2021. Available: <https://fpif.org/learning-from-cambodias-covid-19-response/>  
501 [Accessed 19 Oct 2022 2022].
- 502 14. Wendy Karamba, Isabelle Salcher, Tong K. Results from the High-Frequency Phone Survey  
503 of Households Round 5 (1–21 March 2021), Phnom Penh, Cambodia: World Bank  
504 Group, 2021. Available:

- 505 [https://documents1.worldbank.org/curated/en/833701624563697124/pdf/Main-](https://documents1.worldbank.org/curated/en/833701624563697124/pdf/Main-Report.pdf)  
506 [Report.pdf](https://documents1.worldbank.org/curated/en/833701624563697124/pdf/Main-Report.pdf) [Accessed 16 December 2022].
- 507 15. World Health Organization. Weekly epidemiological update - 9 February 2021, Geneva,  
508 Switzerland: WHO, 2021. Available: [https://www.who.int/publications/m/item/weekly-](https://www.who.int/publications/m/item/weekly-epidemiological-update---9-february-2021)  
509 [epidemiological-update---9-february-2021](https://www.who.int/publications/m/item/weekly-epidemiological-update---9-february-2021) [Accessed 16 December 2022].
- 510 16. Our World in Data. Coronavirus (COVID-19) Cases, 2022. Available:  
511 <https://ourworldindata.org/covid-cases> [Accessed 16 December 2022].
- 512 17. Schiefloe PM. The Corona crisis: a wicked problem. *Scand J Public Health* 2020;49(1):5-8.  
513 doi: 10.1177/1403494820970767
- 514 18. Nicola M, Sohrabi C, Mathew G, *et al.* Health policy and leadership models during the  
515 COVID-19 pandemic: A review. *Int J Surg* 2020;81:122-29. doi:  
516 10.1016/j.ijsu.2020.07.026
- 517 19. Al Saidi AMO, Nur FA, Al-Mandhari AS, *et al.* Decisive leadership is a necessity in the  
518 COVID-19 response. *Lancet* 2020;396(10247):295-98. doi: 10.1016/S0140-  
519 6736(20)31493-8
- 520 20. Stoller JK. Reflections on leadership in the time of COVID-19. *BMJ Leader* 2020;4:77-79.  
521 doi: 10.1136/leader-2020-000244
- 522 21. Kaul V, Shah VH, El-Serag H. Leadership During Crisis: Lessons and Applications from the  
523 COVID-19 Pandemic. *Gastroenterology* 2020;159(3):809-12. doi:  
524 10.1053/j.gastro.2020.04.076
- 525 22. Phillips G, Kendino M, Brolan CE, *et al.* Lessons from the frontline: Leadership and  
526 governance experiences in the COVID-19 pandemic response across the Pacific region.  
527 *Lancet Reg Health West Pac* 2022;25 doi: 10.1016/j.lanwpc.2022.100518
- 528 23. Johnson S, Srey V. Thousands of Cambodians go hungry in strict lockdown zones, Phnom  
529 Penh, Cambodia: The Guardian, 2021. Available: [https://www.theguardian.com/global-](https://www.theguardian.com/global-development/2021/may/13/thousands-of-cambodians-go-hungry-in-strict-lockdown-zones)  
530 [development/2021/may/13/thousands-of-cambodians-go-hungry-in-strict-lockdown-](https://www.theguardian.com/global-development/2021/may/13/thousands-of-cambodians-go-hungry-in-strict-lockdown-zones)  
531 [zones](https://www.theguardian.com/global-development/2021/may/13/thousands-of-cambodians-go-hungry-in-strict-lockdown-zones) [Accessed 16 December 2022].

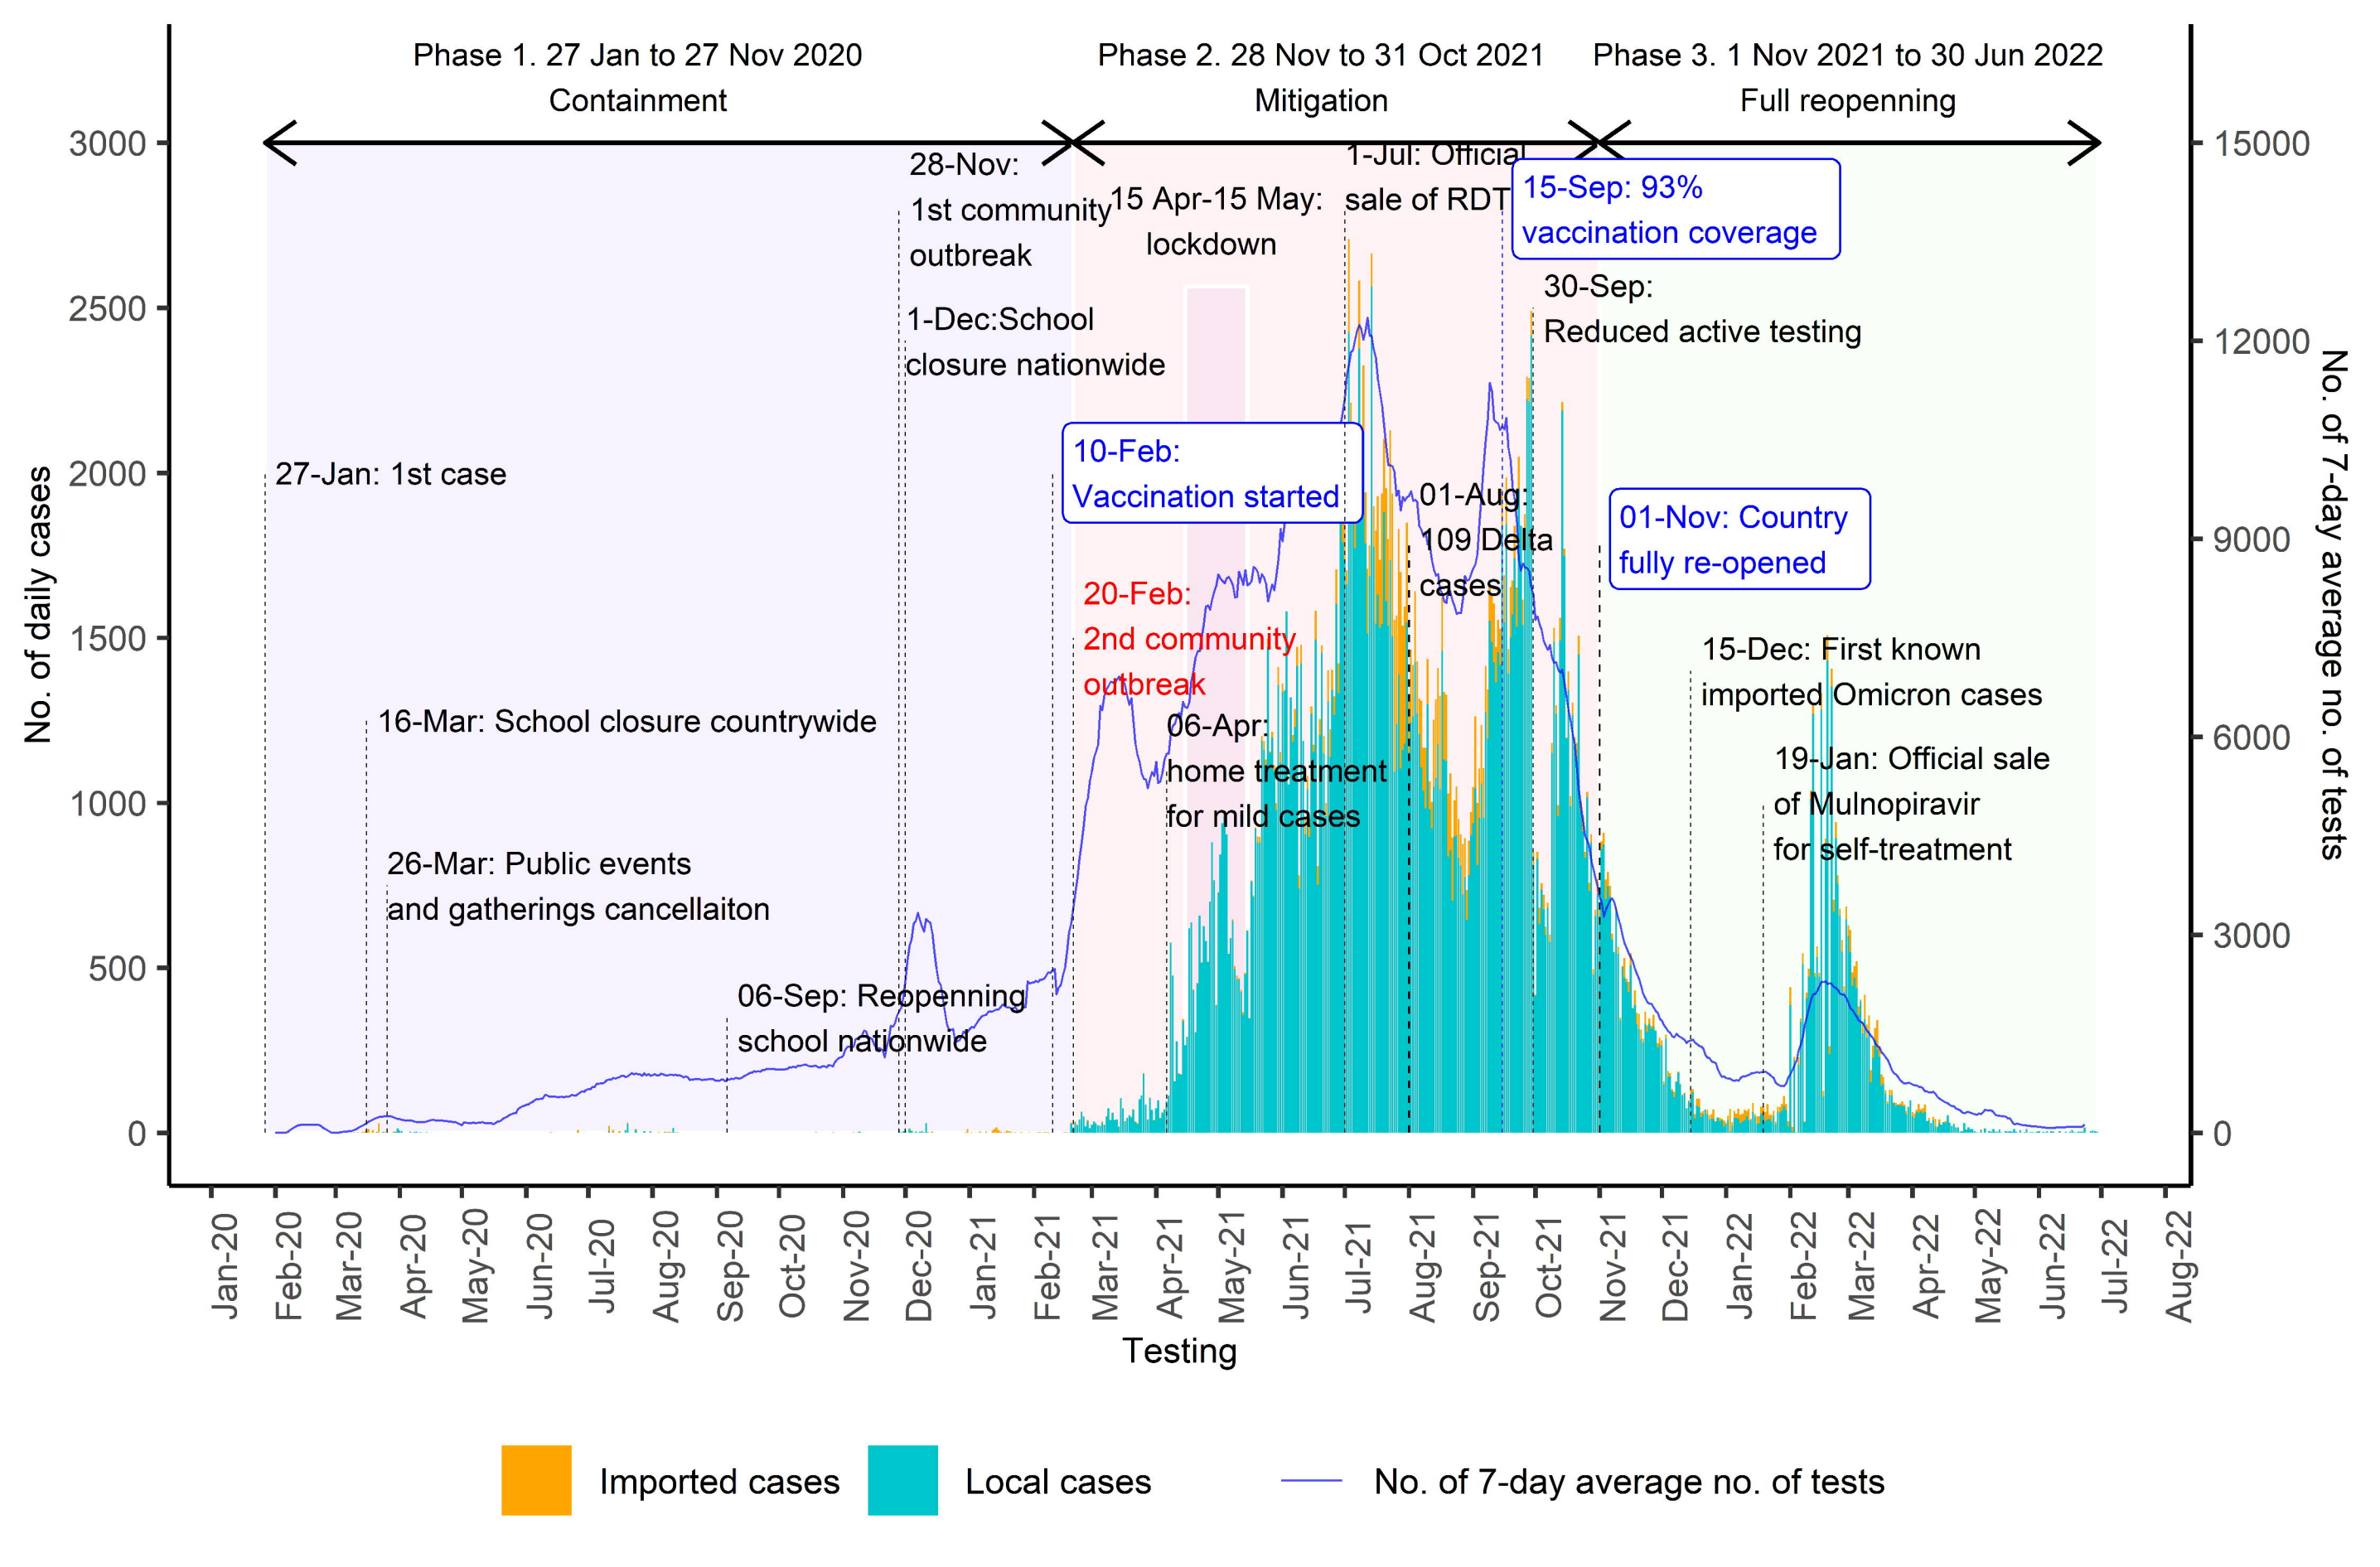

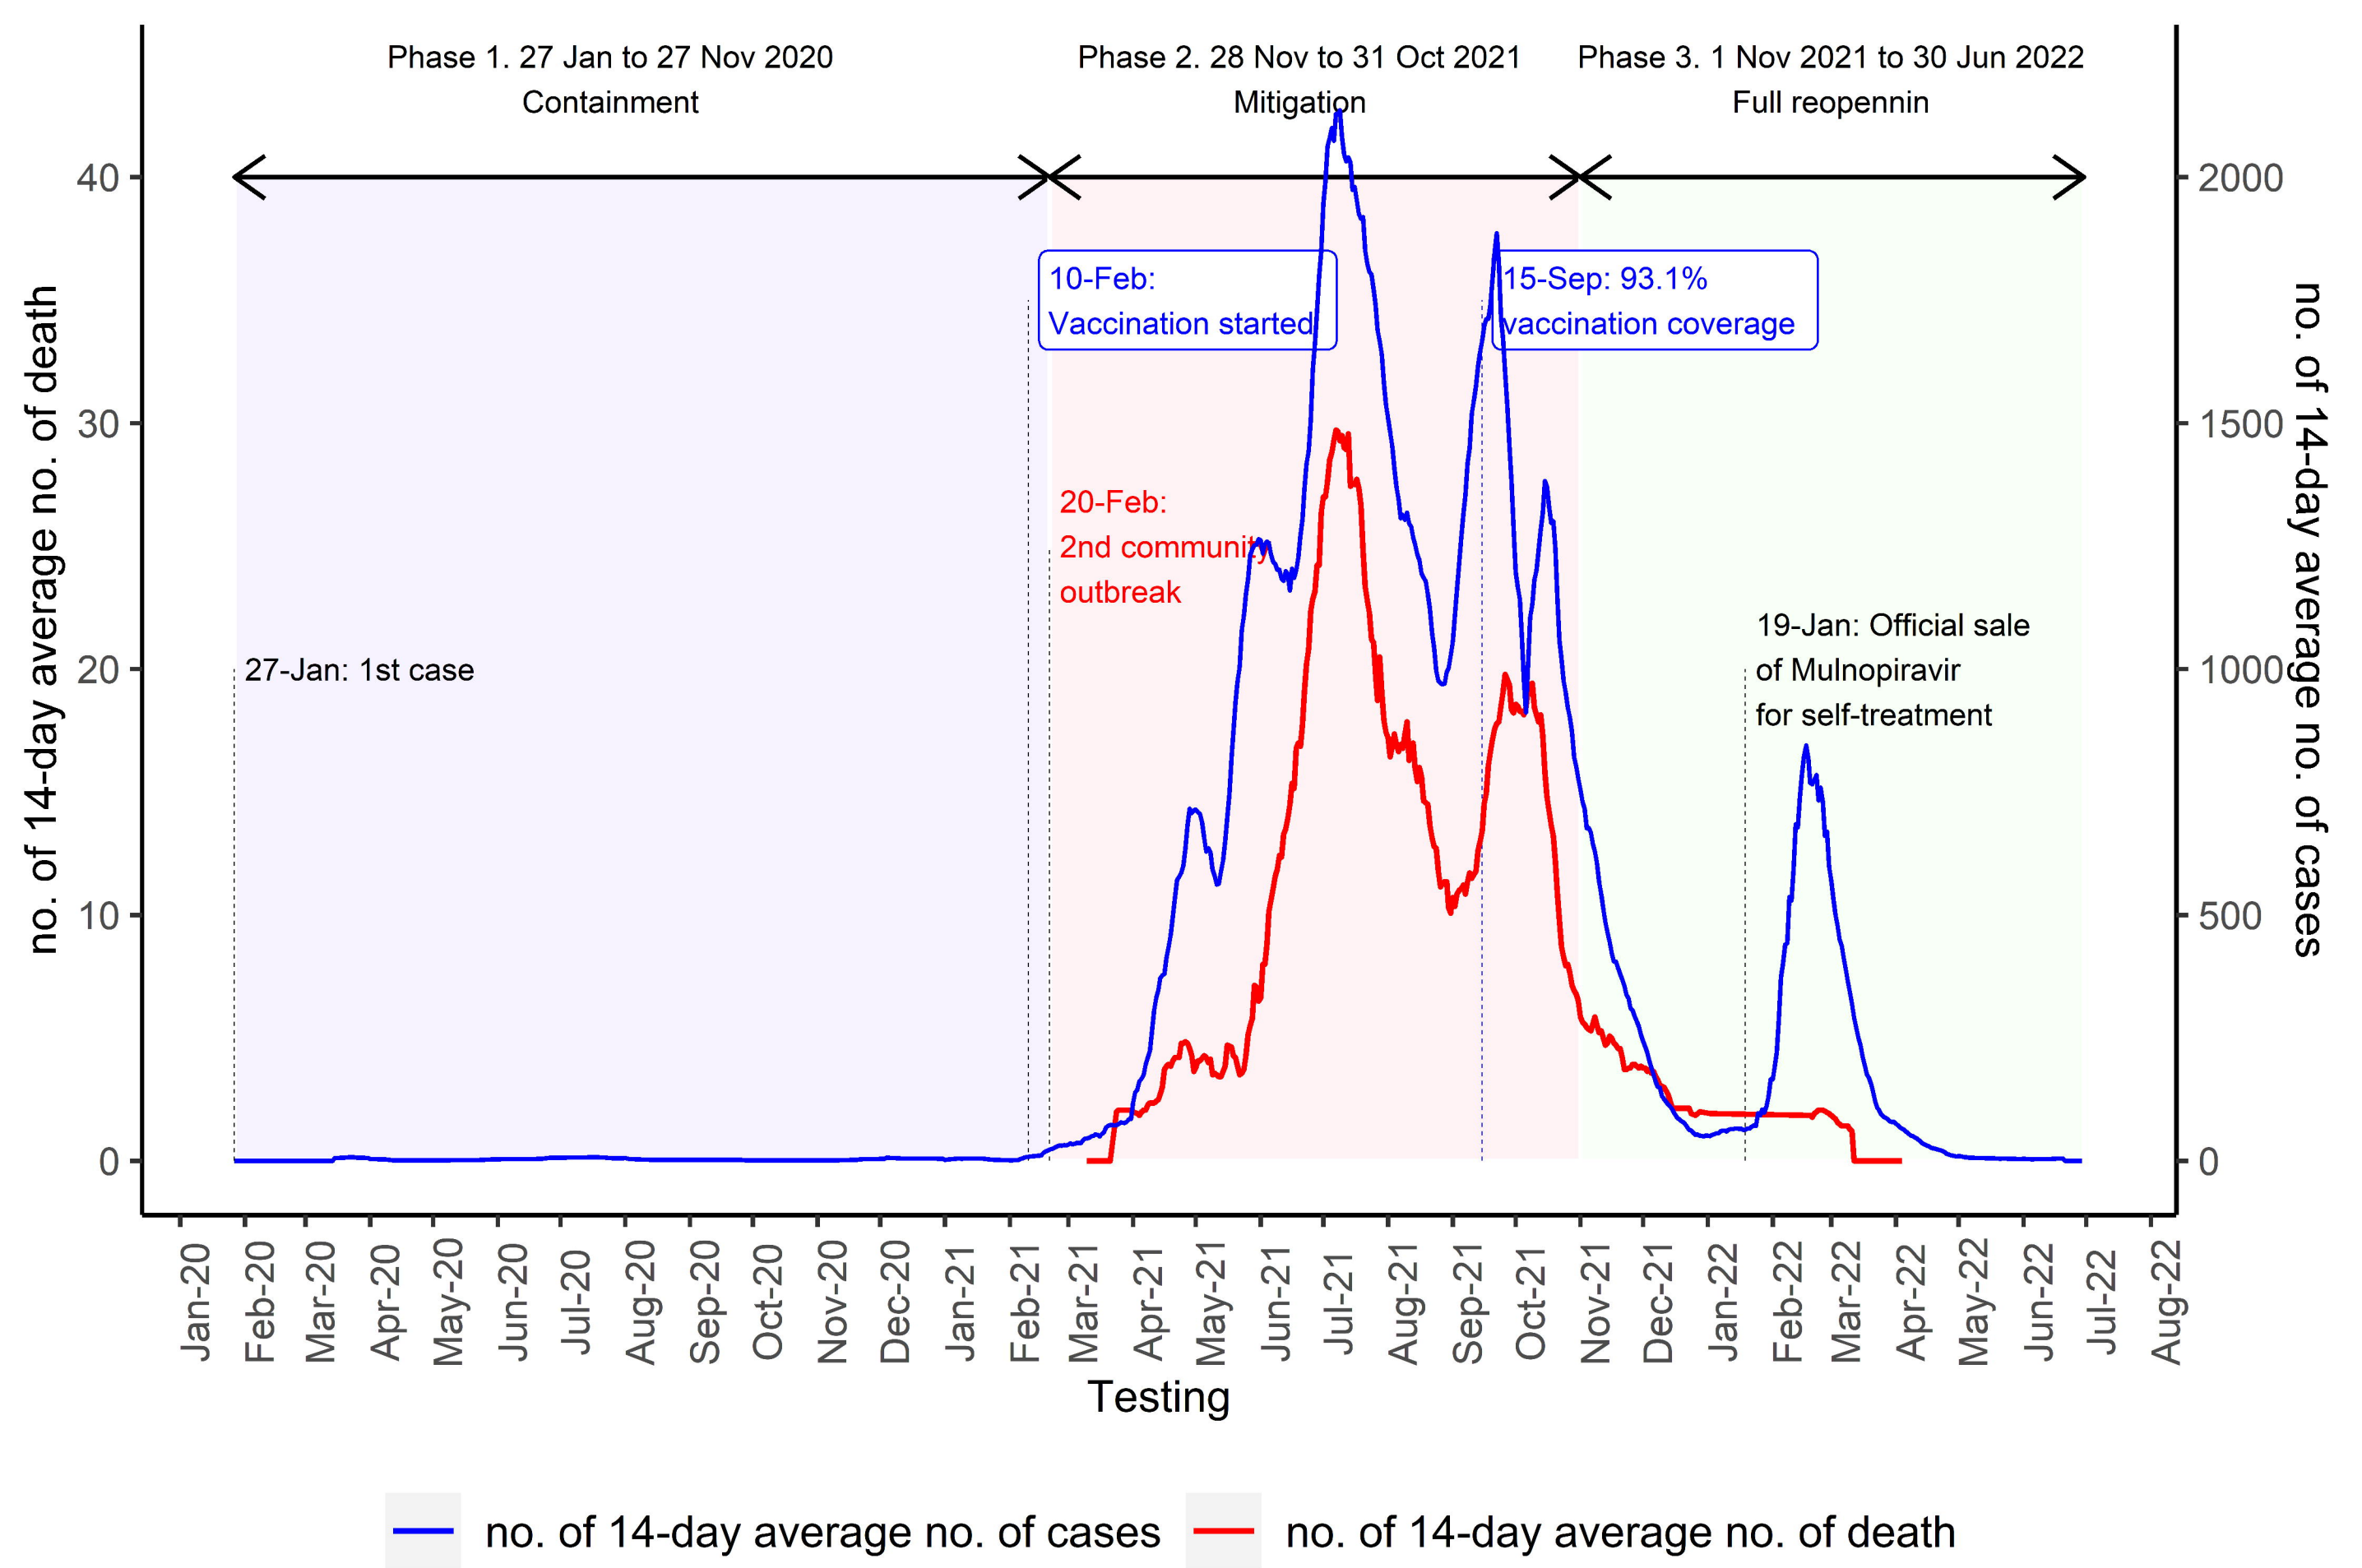

— no. of 14-day average no. of cases 
 — no. of 14-day average no. of death

2021

2022

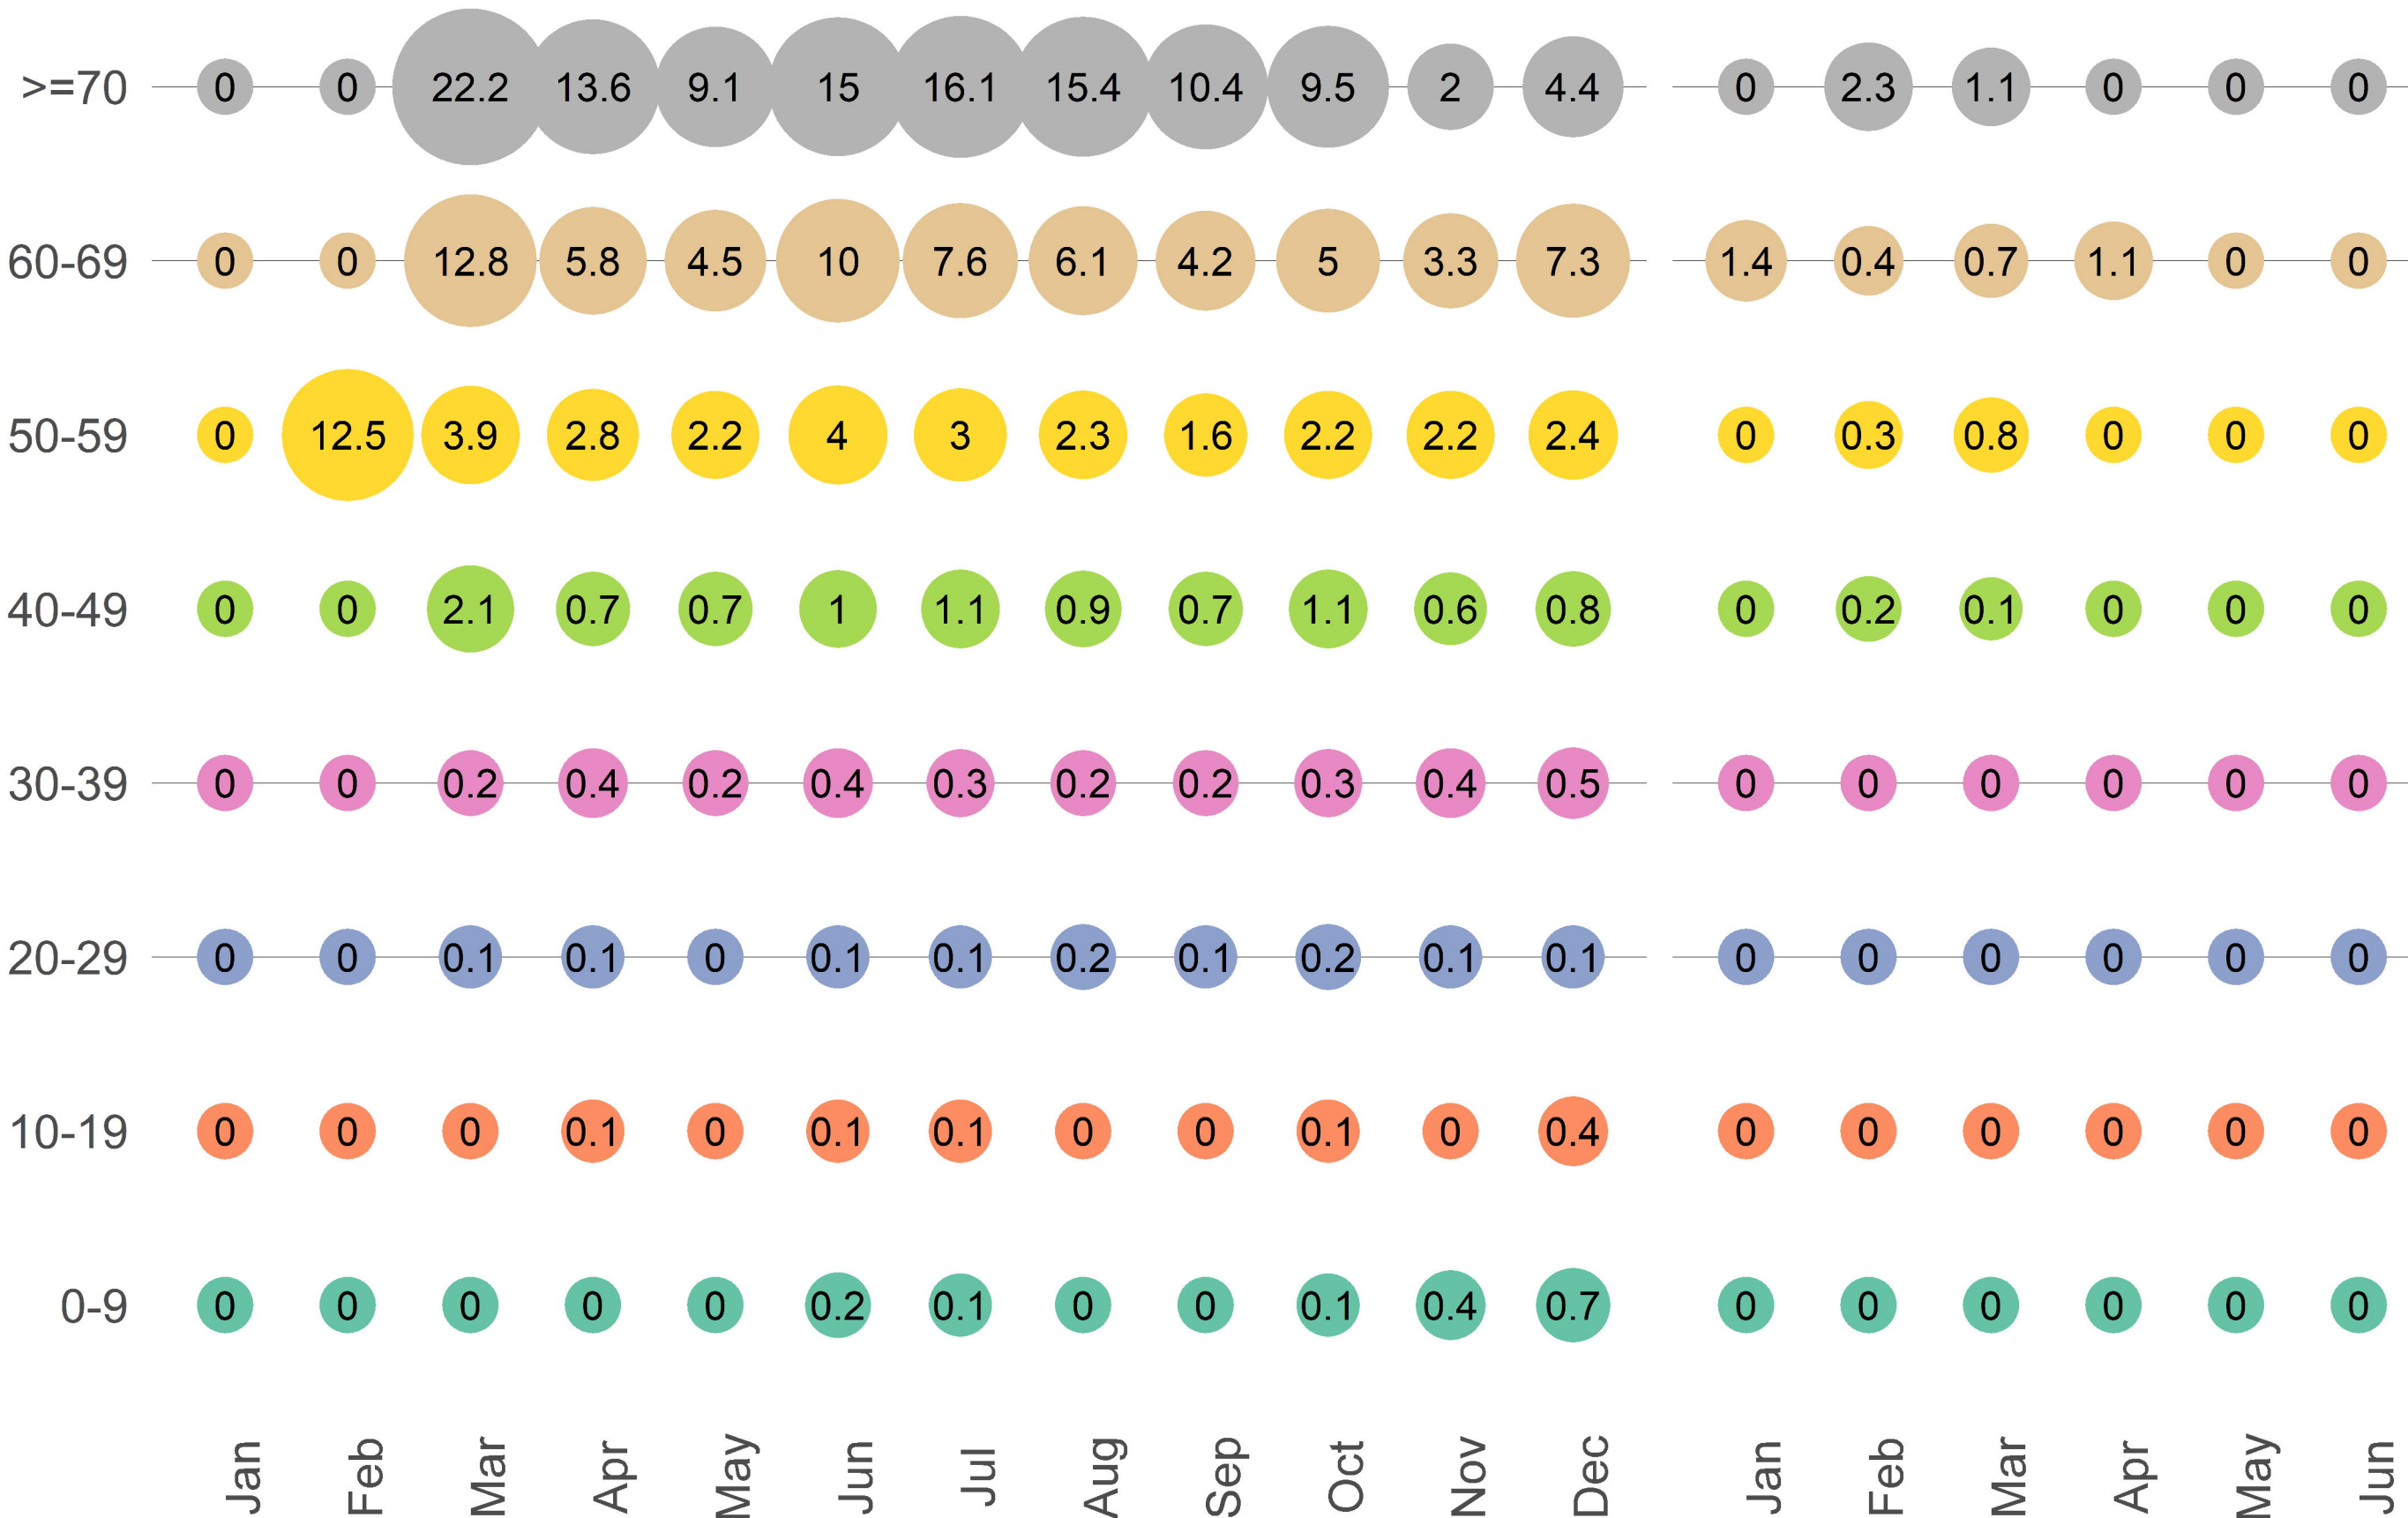

Death rate (%) by month
